# Supplementary material
Source: MDPI journal article supplement (https://www.mdpi.com/2226-471X/8/4/225)
Supplement: s1 [file s1]

# List of Macuxi verbs

| <i>English</i>        | <i>Macuxi</i>                                          |
|-----------------------|--------------------------------------------------------|
| <b>Activity</b>       |                                                        |
| To run                | ka'tumî / eka'temî                                     |
| To walk               | asarî                                                  |
| To swim               | epînamî                                                |
| To talk               | eseurama                                               |
| To scold              | ematîñî                                                |
| To sleep              | we'na                                                  |
| To cry                | karawa                                                 |
| To push               | etukpîmî                                               |
| <b>Accomplishment</b> |                                                        |
| To build              | ikoneka                                                |
| To paint              | ikîpa-pî                                               |
|                       | isakîrîma-pî                                           |
| To plant              | ipîmî                                                  |
| To wash               | rona                                                   |
| To cook               | erinoťî-pî                                             |
| To write              | menuuka / imenuka                                      |
| To clean              | irona ( <i>or to wash</i> )                            |
|                       | kuima ( <i>to sweep</i> )                              |
| To eat                | entamo'ka-pî ( <i>for meals such as lunch</i> )        |
|                       | sekiri'tî-pî ( <i>fruits, sweets</i> )                 |
| To give               | itîrî                                                  |
| To send               | yarima'pî                                              |
| To fish               | konai'pî / moro'yamî yapîsîpî ( <i>to catch fish</i> ) |
| <b>Achievement</b>    |                                                        |
| To break              | ya'mirika ( <i>pot, stones, glass</i> )                |
| To carry              | yanunmî ( <i>lift: only upward action</i> )            |
|                       | pin'tî ( <i>multiple items</i> )                       |

|                     |                                                                                     |
|---------------------|-------------------------------------------------------------------------------------|
|                     | yarĩ ( <i>lift/carry (across the room for example), one item</i> )                  |
| To fall             | tarema ( <i>person</i> )                                                            |
|                     | esenumĩ ( <i>person or tree</i> )                                                   |
|                     | ena ( <i>fruits, or anything above that falls</i> )                                 |
|                     | esoroka ( <i>many things in general, could be applicable to objects or people</i> ) |
| To throw            | inomĩ                                                                               |
| <b>Semelfactive</b> |                                                                                     |
| To hit/knock        | epa'tĩ                                                                              |
| To jump             | rapumĩ / arapumĩ                                                                    |
| To brush            | ya'ka'                                                                              |
| To cut / saw        | ya'tĩ                                                                               |
| To flicker          | eesi'nĩpĩ ( <i>lamp/light/general objects</i> )                                     |
| To laugh            | si'ranĩ                                                                             |
| To cough            | esekatĩ                                                                             |
| To lick             | ame'ka                                                                              |
| To clap             | <i>mia' pa'tĩ' (someone else's hand) / ten-ya pa'tĩ (one's own hand)</i>            |
| <b>State</b>        |                                                                                     |
| To know             | epu'tĩ'-pĩ                                                                          |
| To think            | esenumen'ka                                                                         |
| To believe          | - no direct translation (inna-pe)                                                   |
| To understand       | epuutĩpĩ                                                                            |
| <b>Other verbs</b>  |                                                                                     |
| To rain             | kono'rena                                                                           |
| To choke            | wanĩ re're'pe                                                                       |
| To drip             | - <i>Ideophone: tukui-tukui-pan + ena</i>                                           |
| To move             | - no direct translation ( <i>tĩrĩ: similar to the verb to place</i> )               |
| To blink            | esenpinuku ( <i>eyes (living things)</i> )                                          |
| To touch/tap        | yapĩ                                                                                |
| To drizzle          | - <i>Ideophone: surusuru-pan</i>                                                    |
| To hold             | yapĩsĩ                                                                              |
